# Supplementary material for: A new multi-method approach for dating cave calcite: application to the cave of the Trou du Renard (Soyons, France)
Source: Copernicus journal article supplement (doi:10.5194/egusphere-2023-171), 2023-03-13

SOY-19-02-exo,  $^{234}\text{U}$  mapping (in counts per second)

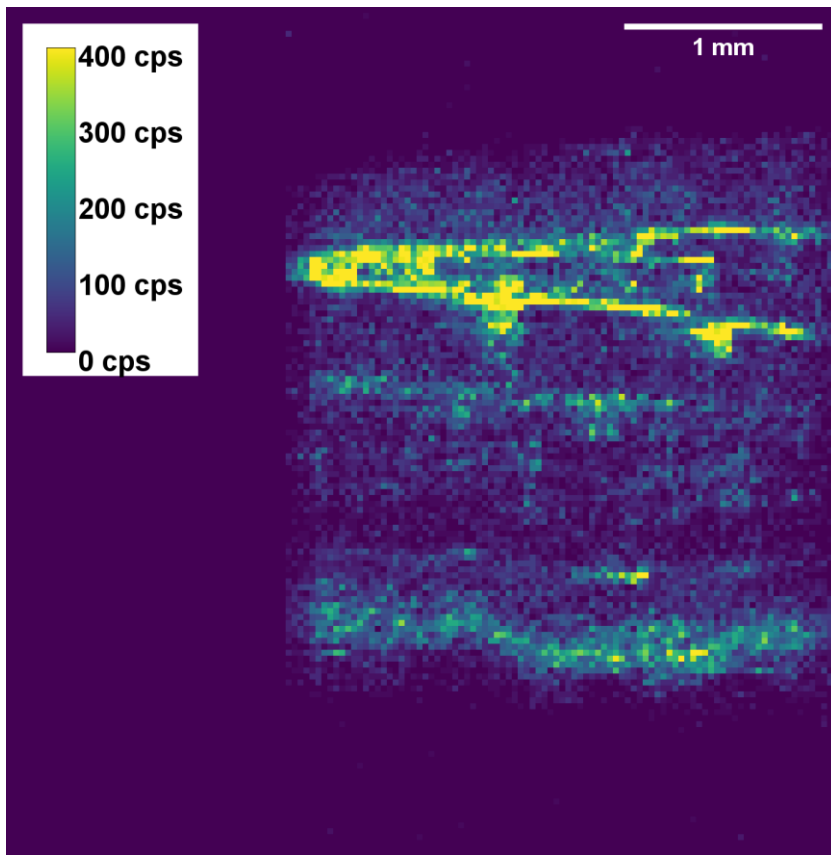

SOY-19-02-exo,  $^{230}\text{Th}$  mapping (in counts per second)

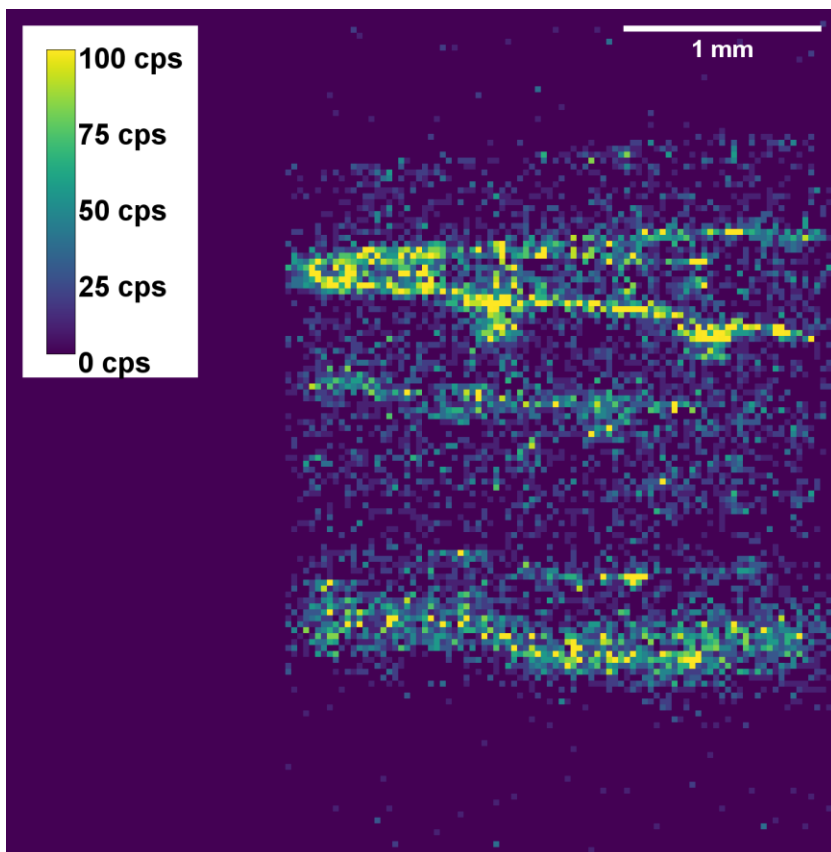

Supplement: Supplementary file [file egusphere-2023-171-AC2-supplement.pdf]
